# Supplementary material for: Barriers and facilitators for the sexual and reproductive health and rights of young people in refugee contexts globally: A scoping review
Source: PubMed Central journal article supplement (PMC7371179; doi:10.1371/journal.pone.0236316), 2020-07-20
Supplement: pone.0236316.s003.pdf [file pone.0236316.s003.pdf]

### **S3 Appendix. Inclusion criteria.**

---

1. The article or publication reports on:

- a. barriers and/or facilitators to sexual and reproductive health and/or rights; or
- b. a sexual and reproductive health and/or rights intervention;

---

2. The study population includes:

- c. young people (aged 10–24); and
- d. refugees, asylum seekers and/or persons forced to move from one country to another;

---

3. The article or publication is written in English; and

---

4. The article or publication was published in the last 10 years (2008 onwards).

---
