# Supplementary material for: Barriers and facilitators for the sexual and reproductive health and rights of young people in refugee contexts globally: A scoping review
Source: PubMed Central journal article supplement (PMC7371179; doi:10.1371/journal.pone.0236316), 2020-07-20
Supplement: pone.0236316.s004.pdf [file pone.0236316.s004.pdf]

#### **S4 Appendix. Keywords used for searching.**

1. "sexual health" OR "sexual rights" OR "reproductive health" OR "reproductive rights" OR SRHR OR SRH OR contracepti\* OR pregnan\* OR "maternal health" OR maternity OR antenatal OR postnatal OR obstetric OR delivery OR aborti\* OR post-aborti\* OR "family planning" OR "sexually transmitted" OR STI OR STD OR HIV OR "gender-based violence" OR "intimate partner violence" OR "sexual abuse" OR "female genital" OR FGM OR "female circumcision"
2. AND (barrier\* OR facilitator\* OR intervention\* OR service\* OR program\* OR information OR education\*)
3. AND (adolescen\* OR young OR youth)
4. AND (migrant OR migrants OR migration OR refugee\* OR "asylum seekers")
