# Supplementary material for: Barriers and facilitators for the sexual and reproductive health and rights of young people in refugee contexts globally: A scoping review
Source: PubMed Central journal article supplement (PMC7371179; doi:10.1371/journal.pone.0236316), 2020-07-20
Supplement: pone.0236316.s005.pdf [file pone.0236316.s005.pdf]

**S5 Appendix. Full search strategy used for the ‘Global Health’ electronic database.**

|                                                     |                                                                                                                                                                                                                                                                                                                                                                                                                                                     |
|-----------------------------------------------------|-----------------------------------------------------------------------------------------------------------------------------------------------------------------------------------------------------------------------------------------------------------------------------------------------------------------------------------------------------------------------------------------------------------------------------------------------------|
| <b>1) Sexual and Reproductive Health and Rights</b> |                                                                                                                                                                                                                                                                                                                                                                                                                                                     |
| Keywords:                                           | "sexual health" OR "sexual rights" OR "reproductive health" OR "reproductive rights" OR SRHR OR SRH OR contracepti* OR pregnan* OR "maternal health" OR maternity OR antenatal OR postnatal OR obstetric OR delivery OR aborti* OR post-aborti* OR "family planning" OR "sexually transmitted" OR STI OR STD OR HIV OR "gender-based violence" OR "intimate partner violence" OR "sexual abuse" OR "female genital" OR FGM OR "female circumcision" |
| Controlled vocabulary:                              | sexual health/ OR reproductive health/ OR contraceptives/ OR contraception/ OR pregnancy/ OR pregnant adolescents/ OR maternity/ OR prenatal care/ obstetrics/ OR abortion/ OR induced abortion/ OR family planning/ OR sexually transmitted diseases/ OR human immunodeficiency viruses/ OR HIV infections/ OR domestic violence/ OR spouse abuse/ OR sexual abuse/                                                                                |
| <b>AND</b>                                          |                                                                                                                                                                                                                                                                                                                                                                                                                                                     |
| <b>2) Barriers/Facilitators/Interventions</b>       |                                                                                                                                                                                                                                                                                                                                                                                                                                                     |
| Keywords:                                           | barrier* OR facilitator* OR intervention* OR service* OR program* OR information OR education*                                                                                                                                                                                                                                                                                                                                                      |
| Controlled vocabulary:                              | social barriers/ OR intervention/ OR health services/ OR maternity services/ OR medical services/ OR public health services/ OR services/ OR social services/ OR programs/ OR program evaluation/ OR information/ OR education/ OR education programmes/ OR health education/ OR medical education/ OR sex education/ OR prenatal education/                                                                                                        |
| <b>AND</b>                                          |                                                                                                                                                                                                                                                                                                                                                                                                                                                     |
| <b>3) Population: Young People (10-24 years)</b>    |                                                                                                                                                                                                                                                                                                                                                                                                                                                     |
| Keywords:                                           | adolescen* OR young OR youth                                                                                                                                                                                                                                                                                                                                                                                                                        |
| Controlled vocabulary:                              | adolescents/ OR youth/                                                                                                                                                                                                                                                                                                                                                                                                                              |
| <b>AND</b>                                          |                                                                                                                                                                                                                                                                                                                                                                                                                                                     |
| <b>4) Population: Refugees, Asylum Seekers</b>      |                                                                                                                                                                                                                                                                                                                                                                                                                                                     |
| Keywords:                                           | migrant OR migrants OR migration OR refugee* OR "asylum seekers"                                                                                                                                                                                                                                                                                                                                                                                    |
| Controlled vocabulary:                              | migrants/ OR migration/ OR refugees/                                                                                                                                                                                                                                                                                                                                                                                                                |

Filters: English Language, Publication Year (2008-current)
