# Supplementary material for: Barriers and facilitators for the sexual and reproductive health and rights of young people in refugee contexts globally: A scoping review
Source: PubMed Central journal article supplement (PMC7371179; doi:10.1371/journal.pone.0236316), 2020-07-20
Supplement: pone.0236316.s006.pdf [file pone.0236316.s006.pdf]

**S6 Appendix. 7-item form for the screening process.**

|                                                                                                                                                                                                                                                                                                                                                                                                                                                                                                                                                                                                        |
|--------------------------------------------------------------------------------------------------------------------------------------------------------------------------------------------------------------------------------------------------------------------------------------------------------------------------------------------------------------------------------------------------------------------------------------------------------------------------------------------------------------------------------------------------------------------------------------------------------|
| <p><i>Background information:</i></p> <p>Paper identification #</p> <p>Name of screener</p> <p>Date of screening</p> <p>Does the title fit?</p>                                                                                                                                                                                                                                                                                                                                                                                                                                                        |
| <p><i>Screening questions (1 indicates 'yes' and 0 indicates 'no'):</i></p> <p>Is the study published in a peer-reviewed journal?</p> <p>If “No” to previous, is the study published in the grey literature?</p> <p>Is the study about perceived barriers/facilitators to SRHR?</p> <p>Is the study about a SRHR programme/intervention?</p> <p>Are the participants/people in focus aged between 10-24?</p> <p>Are the participants/people in focus refugees or people who have had to move from one country to another?</p> <p>Has the study been published in the last 10 years (2008-onwards)?</p> |
| <p><i>Assessment:</i></p> <p>Included</p> <p>Excluded following initial screening (Title/Abstract)</p> <p>Excluded following full text screening</p> <p>If excluded, please indicate the reason why:</p>                                                                                                                                                                                                                                                                                                                                                                                               |
