# Supplementary material for: Barriers and facilitators for the sexual and reproductive health and rights of young people in refugee contexts globally: A scoping review
Source: PubMed Central journal article supplement (PMC7371179; doi:10.1371/journal.pone.0236316), 2020-07-20
Supplement: pone.0236316.s007.pdf [file pone.0236316.s007.pdf]

**S7 Appendix. 27-item template for data extraction.**

|                                                                                                                                                                                                                                                                                                                                                                                                                                                                                                                                                                                           |
|-------------------------------------------------------------------------------------------------------------------------------------------------------------------------------------------------------------------------------------------------------------------------------------------------------------------------------------------------------------------------------------------------------------------------------------------------------------------------------------------------------------------------------------------------------------------------------------------|
| <p><i>Background information:</i></p> <p>Paper identification #</p> <p>Name of data extractor</p> <p>Date of extraction (dd/mm/yy)</p> <p>Publication title</p> <p>Type of publication (grey literature or published literature)</p> <p>Year of publication</p> <p>Authors names</p> <p>Journal name</p> <p>Institution (for grey literature)</p> <p>Country</p> <p>Language</p> <p>Population</p> <p>Age range of participants</p> <p>Gender (M/F/mixed)</p> <p>Ethical considerations made/ethical approval and consent received</p> <p>Other important participant characteristics</p> |
| <p><i>Study design and analysis:</i></p> <p>Study design</p> <p>Purpose of data collection</p> <p>Sample size</p> <p>Data collection methods (e.g. focus group discussions)</p> <p>Data analysis techniques</p> <p>Key findings</p>                                                                                                                                                                                                                                                                                                                                                       |
| <p><i>Barriers:</i></p> <p>Barriers</p>                                                                                                                                                                                                                                                                                                                                                                                                                                                                                                                                                   |
| <p><i>Facilitators:</i></p> <p>Facilitators</p> <p>Other important details about barriers and/or facilitators</p>                                                                                                                                                                                                                                                                                                                                                                                                                                                                         |
| <p><i>Interventions:</i></p> <p>Intervention name</p> <p>Intervention size (# of participants)</p> <p>Main intervention setting (e.g. school)</p> <p>Activities</p> <p>Other important details</p>                                                                                                                                                                                                                                                                                                                                                                                        |
