# Supplementary material for: Barriers and facilitators for the sexual and reproductive health and rights of young people in refugee contexts globally: A scoping review
Source: PubMed Central journal article supplement (PMC7371179; doi:10.1371/journal.pone.0236316), 2020-07-20
Supplement: pone.0236316.s008.pdf [file pone.0236316.s008.pdf]

**S6 Appendix. Examples of the coding process.**

| <b>Meaning Unit</b>                                                                                    | <b>Condensed Meaning Unit</b>          | <b>Code</b>            | <b>Sub-category</b> | <b>Category</b>             |
|--------------------------------------------------------------------------------------------------------|----------------------------------------|------------------------|---------------------|-----------------------------|
| 'Girls face several challenges reporting rape and other forms of GBV through formal channels' [43]     | Challenges reporting rape and GBV      | Public policy and laws | Regulations         | Structural                  |
| 'The condom dispensers in the camps—which allow for confidential use—were reportedly often empty' [39] | Condom dispensers in camps often empty | Resourcing of services | Services            | Institutional/health system |
