# Supplementary material for: Barriers and facilitators for the sexual and reproductive health and rights of young people in refugee contexts globally: A scoping review
Source: PubMed Central journal article supplement (PMC7371179; doi:10.1371/journal.pone.0236316), 2020-07-20
Supplement: pone.0236316.s009.pdf [file pone.0236316.s009.pdf]

**S9 Appendix. Critical appraisal of included publications.**

| Paper Identification # | Qualitative Criteria |                 |               |                |                | Quantitative Criteria |              |             |          |                         |                           |               |
|------------------------|----------------------|-----------------|---------------|----------------|----------------|-----------------------|--------------|-------------|----------|-------------------------|---------------------------|---------------|
|                        | Credibility          | Transferability | Dependability | Confirmability | Quality Rating | Selection Bias        | Study Design | Confounders | Blinding | Data Collection Methods | Withdrawals and Drop-outs | Global Rating |
| 4820954                | B                    | B               | A             | B              | HIGH           | N/A                   | N/A          | N/A         | N/A      | N/A                     | N/A                       | N/A           |
| 7297284                | B                    | B               | B             | C              | MODERATE       | N/A                   | N/A          | N/A         | N/A      | N/A                     | N/A                       | N/A           |
| 7297285                | B                    | B               | B             | C              | MODERATE       | N/A                   | N/A          | N/A         | N/A      | N/A                     | N/A                       | N/A           |
| 7297286                | B                    | B               | B             | C              | MODERATE       | N/A                   | N/A          | N/A         | N/A      | N/A                     | N/A                       | N/A           |
| 14380710               | A                    | A               | A             | B              | HIGH           | N/A                   | N/A          | N/A         | N/A      | N/A                     | N/A                       | N/A           |
| 14380774               | B                    | A               | C             | C              | MODERATE       | N/A                   | N/A          | N/A         | N/A      | N/A                     | N/A                       | N/A           |
| 14380876               | B                    | B               | C             | C              | MODERATE       | N/A                   | N/A          | N/A         | N/A      | N/A                     | N/A                       | N/A           |
| 14380885               | B                    | A               | C             | C              | MODERATE       | N/A                   | N/A          | N/A         | N/A      | N/A                     | N/A                       | N/A           |
| 14380999               | B                    | A               | B             | C              | MODERATE       | 2                     | 3            | 3           | 3        | 3                       | N/A                       | WEAK          |
| 14381070               | B                    | B               | B             | B              | HIGH           | N/A                   | N/A          | N/A         | N/A      | N/A                     | N/A                       | N/A           |
| 14382433               | B                    | B               | B             | C              | MODERATE       | 2                     | 3            | 3           | 3        | 2                       | N/A                       | WEAK          |
| 14382444               | B                    | A               | B             | B              | HIGH           | N/A                   | N/A          | N/A         | N/A      | N/A                     | N/A                       | N/A           |
| 14382480               | C                    | B               | C             | C              | LOW            | 2                     | 3            | 3           | 3        | 3                       | N/A                       | WEAK          |
| 14382490               | C                    | B               | C             | B              | MODERATE       | N/A                   | N/A          | N/A         | N/A      | N/A                     | N/A                       | N/A           |
| 14382491               | B                    | C               | C             | C              | LOW            | 2                     | 3            | 3           | 3        | 3                       | N/A                       | WEAK          |
| 14382492               | B                    | B               | B             | A              | HIGH           | 3                     | N/A          | N/A         | N/A      | N/A                     | N/A                       | N/A           |
| 14382493               | B                    | A               | C             | C              | MODERATE       | N/A                   | N/A          | N/A         | N/A      | N/A                     | N/A                       | N/A           |
| 14382497               | B                    | A               | B             | A              | HIGH           | 3                     | 3            | 3           | 3        | 2                       | N/A                       | WEAK          |
| 14382504               | C                    | B               | C             | C              | LOW            | 3                     | 3            | 3           | 3        | 2                       | N/A                       | WEAK          |
| 14382522               | B                    | B               | C             | C              | MODERATE       | N/A                   | N/A          | N/A         | N/A      | N/A                     | N/A                       | N/A           |
| 14382523               | C                    | B               | C             | C              | LOW            | N/A                   | N/A          | N/A         | N/A      | N/A                     | N/A                       | N/A           |
| 15375508               | B                    | B               | B             | C              | MODERATE       | N/A                   | N/A          | N/A         | N/A      | N/A                     | N/A                       | N/A           |
| 10000001               | B                    | A               | B             | C              | MODERATE       | 2                     | 3            | 3           | 3        | 3                       | N/A                       | WEAK          |
| 10000002               | C                    | B               | C             | C              | LOW            | N/A                   | N/A          | N/A         | N/A      | N/A                     | N/A                       | N/A           |
| 10000005               | A                    | A               | A             | B              | HIGH           | 2                     | 1            | 1           | 2        | 2                       | 3                         | MODERATE      |
| 10009                  | N/A                  | N/A             | N/A           | N/A            | N/A            | 1                     | 3            | 3           | 1        | 3                       | N/A                       | WEAK          |
| 10010                  | A                    | B               | A             | C              | MODERATE       | N/A                   | N/A          | N/A         | N/A      | N/A                     | N/A                       | N/A           |
| 10012                  | A                    | A               | A             | C              | HIGH           | N/A                   | N/A          | N/A         | N/A      | N/A                     | N/A                       | N/A           |
| 10078                  | B                    | A               | A             | A              | HIGH           | N/A                   | N/A          | N/A         | N/A      | N/A                     | N/A                       | N/A           |
| 10118                  | B                    | A               | B             | C              | MODERATE       | 1                     | 3            | 1           | 1        | 2                       | N/A                       | MODERATE      |
